# Supplementary material for: Changes in inpatient payer-mix and hospitalizations following Medicaid expansion: Evidence from all-capture hospital discharge data
Source: PLOS journal article supplement (doi:10.1371/journal.pone.0183616), 2017-09-28
Supplement: S7 (10.1371/journal.pone.0183616.s007) [file journal.pone.0183616.s007]

**S3 Fig. Difference-in-Difference Estimates of Effect of Medicaid Expansion on Payer mix with Controls.**

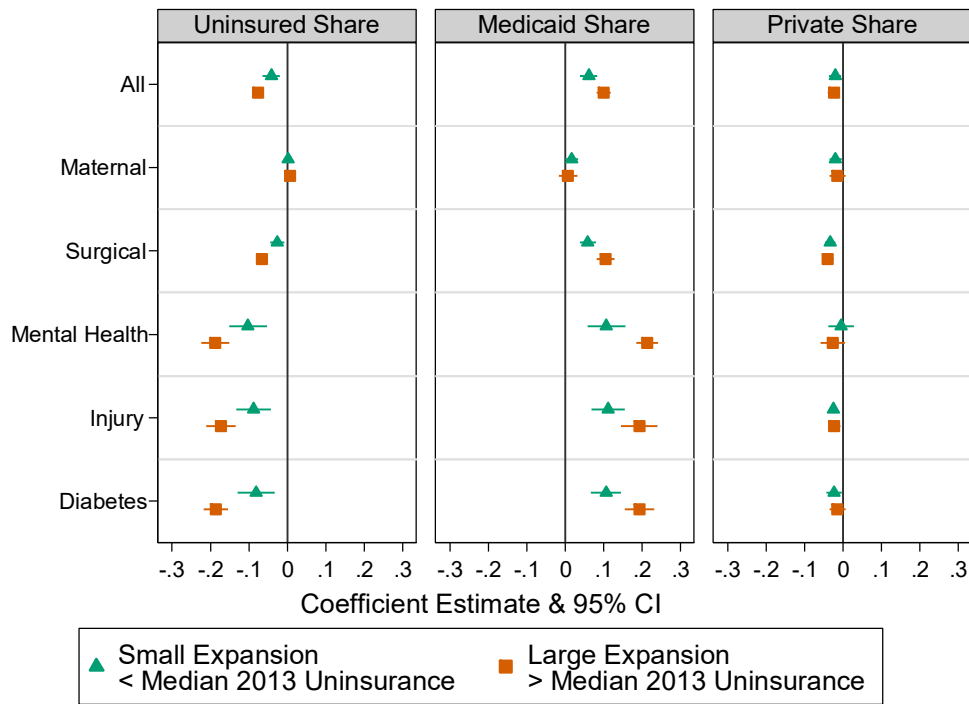

Notes: This figure replicates the results of Figure 1 and S4 Fig with the addition of age, sex, marital status, income and education distributions of the state as well as the unemployment rate as control variables.
